# Supplementary material for: Are we working (too) comfortably?: the systematic development of an intervention to support workers to move more while working at home
Source: Int J Behav Nutr Phys Act. 2025 Jun 23;22:84. doi: 10.1186/s12966-025-01762-3 (PMC12183816; doi:10.1186/s12966-025-01762-3)
Supplement: Supplementary file 1 — Supplementary Material 1. Broad and detailed intervention components mapped to Behaviour Change Techniques (BCTs). [file 12966_2025_1762_MOESM1_ESM.xlsx]

## Sheet: Detailed components
Broad intervention component	Detailed component	Delivered via	Notes
Array of training/ resources to cultivate physical skills among employees	Toolkit comprising an array of strategies/resources:	Actify (PAHRCW@H)
	Videos and annimations on sedentary behaviour and suggestions on how to move more while working at home	Actify (PAHRCW@H)
	Videos and text on 50 minute meetings (and stretch between meetings)	Actify (PAHRCW@H)	Blog webpage is not our material
	Information on DIY desks	Actify (PAHRCW@H)
	One-minute movers videos	Actify (PAHRCW@H)	Not our material
	Yoga videos	Actify (PAHRCW@H)
	information on kneeling while working	Actify (PAHRCW@H)	Webpage is not our material
	Step count challenge information	Actify (PAHRCW@H)	Not our material
	Daily mile information	Actify (PAHRCW@H)	Webpage is not our material
	Suggestion to block out time in the calendar for movement	Actify (PAHRCW@H)
	Suggestion to incentivise breaks through self-delivered rewards	Actify (PAHRCW@H)
Array of training/ resources to cultivate psychological skills among employees	Toolkit comprising an array of strategies/resources:
	Desk time calculator	Actify (PAHRCW@H)
	Pomodoro Technique (Text and link)	Actify (PAHRCW@H)	Not our material
	Link to Sticky Notes App	Actify (PAHRCW@H)	Not our material
	Information on action planning across the 4 weeks on the Toolkit	Actify (PAHRCW@H)	Not our material
	Reminders to move- Prompts delivered via MS Teams	MS Teams	currently only available to deliver internally - working to explore how to deliver to external organisations
Action planning	Information and instructions for action planning across the 4 weeks in the Toolkit	Actify (PAHRCW@H)
	link to Sticky Notes App	Actify (PAHRCW@H)	Not our material
Education on SB	Introduction to the issue video	Actify (PAHRCW@H)
	Infographic about sedentary behaviour while working at home	Actify (PAHRCW@H)
	Desk time calculator	Actify (PAHRCW@H)
	Education through organisational initiatives and communication such as emails from LMs, one-on-one with LMs (see intervention components relating to LM, organisational initiatives and policies)	Actify (PAHRCW@H)
	Toolkit created to allow for 'drip-feeding’ information	Actify (PAHRCW@H)
Intention formation	Information and instructions for action planning across the 4 weeks in the Toolkit	Actify (PAHRCW@H)
	link to Sticky Notes App	Actify (PAHRCW@H)	Not our material
Training/resources for LM on knowledge about employees SB, factors impacting SB and opportunities to move	Introduction to the 'issue' video	Actify (PAHRCW@H)
	The importance of workplace culture video	Actify (PAHRCW@H)
	Step 1. Prioritisation checklist: What can change contains detailed information on opportunities for employees to move more	Actify (PAHRCW@H)
	Step 2. How to make changes includes suggestions on how to support employees to move more	Actify (PAHRCW@H)
	Step 3. Action planning template provides a template to implement ideas and plans to support employees move more	Actify (PAHRCW@H)
Strategies to increase movement over the day while working from home	Ditch the screen and have an active meeting-text and video	Actify (PAHRCW@H)
	Could you do 2-minutes of movement during meetings? Video- Movement ideas (Week 1 - Move more meetings)	Actify (PAHRCW@H)
	Suggestion for 50 minute meetings and stretch between meetings- text and video (Week 1 - Move more meetings)	Actify (PAHRCW@H)	Blog webpage is not our material
	information on kneeling while working (Week 1 - Move more meetings)	Actify (PAHRCW@H)	Not our material
	Tip for taking active breaks-Time for a short break- have a boogie video (Week 2. Active Breaks Week)	Actify (PAHRCW@H)
	Tips for taking an active break- Making a hot drink- could you try kettle-cises video (Week 2. Active Breaks Week)	Actify (PAHRCW@H)
	One minute movers videos (Week 2. Active Breaks Week)	Actify (PAHRCW@H)	Not our material
	Tips for taking an active break-Could you take a break and get some quick chores done? Why not water your plants? Video (Week 2. Active Breaks Week)	Actify (PAHRCW@H)
	Suggestion to take micro breaks (Week 2. Active Breaks Week)	Actify (PAHRCW@H)	Not our material
	Yoga breaks (Week 2. Active Breaks Week)	Actify (PAHRCW@H)	Note- says external links?
	Tips on integrating home to home commute - text and video (Week 3. Active Commute Week)	Actify (PAHRCW@H)
	Tips on integrating home to home commute -Become part of the Daily Mile nation- text and link (Week 3. Active Commute Week)	Actify (PAHRCW@H)
	Tips for integrating Tech to help us move more- Text on using tools on Laptop/computer, smartphone, smart speaker, watches (Week 4. Tech Week)	Actify (PAHRCW@H)
	Tips for integrating Tech to help us move more- Microsoft the clock app (Week 4. Tech Week)	Actify (PAHRCW@H)	Link to App
	Tips for integrating Tech to help us move more-The Pomodoro Technique (Week 4. Tech Week)	Actify (PAHRCW@H)	Not our material
	note add the incentivisation component
Suggestions to create make-shift equipment	DIY Sit-Stand Desk text and link (Week 1 - Move more meetings)	Actify (PAHRCW@H)	Link is not our material
Suggestions for organisational initiatives to promote movement while WFH	Step 1. Prioritisation checklist: What can change includes thinking about and prioritising organisational initiatives to support moving more (Step count challenge, scheduling moving meetings)	Actify (PAHRCW@H)
	Step 2. How to make changes includes suggestions for increasing employee access to work-related equipment	Actify (PAHRCW@H)
	Step 2. How to make changes includes: (i) Suggestion to encourage employees to choose to take breaks while working and to move during online meetings and letting them know that this is a good thing to do. (ii) Suggestions for organised challenges (e.g. Step count Challenge, Active minutes challenge using fitness trackers) Encouraging moving during meetings (iii) Supporting colleagues to assign ti…	Actify (PAHRCW@H)
Suggestions for actions and initiatives from LMs to demonstrate support for movement while WFH	Step 1. Prioritisation checklist: What can change helps line managers and leaders think about and prioritise elements that can help employees move more while WFH	Actify (PAHRCW@H)
	Step 2. How to make changes includes Email templates that LMs can send out to employees on: (i) The consequences of prolonged time spent sitting at a desk (iii) Opportunities for moving more during the work from home day (Iiii) Why you shouldn’t feel guilty about taking movement breaks while working at home (iv) The benefits of taking breaks: dispelling productivity myths (v) Consider Becoming a …	Actify (PAHRCW@H)
	Step 2. How to make changes includes (i) Suggestion for LMs to discuss the benefits of break-taking and moving during team meetings or one-to-one meetings (ii) Suggestion to signpost Toolkit and Toolkit elements
	Step 2. How to make changes includes suggestion to lead by example and be a role model	Actify (PAHRCW@H)
Suggestions for policies and action that impact culture (Including culture around online working) to allow for increased movement while working from home	Step 1. Prioritisation checklist: What can change Includes think about organisational policies to support moving more and changing social norms (for e.g. addressing lack of organisational policies, email etiquette, gaps between online meetings or standing during online meetings, addressing social pressure employees may feel to be avilable online all day)	Actify (PAHRCW@H)
	Step 2. How to make changes includes (i) suggestion to encourage employees to choose to take breaks while working and to move during online meetings and to let them know that this is a good thing to do (ii) Suggestion to adopt flexible working policies (iii) Suggestion to adopt 50 minute meetings (iv) Out of hours email or online communication policy (v) Normalising activities such as moving duri…	Actify (PAHRCW@H)
Suggestions for how colleagues can support each other to promote movement while WFH and initiatives that increase social support	Tips on integrating home to home commute - join a team challenge (Week 3. Active Commute Week)	Actify (PAHRCW@H)
	Step 1. Prioritisation checklist: What can change Includes thinking about increasing perceived support from colleagues	Actify (PAHRCW@H)
	Step 2. How to make changes includes suggestions for managers and other leaders act as role models and ‘lead by example’ through use of email templates, LMs and other leaders acting as a role model and giving explicit permission to move	Actify (PAHRCW@H)
Suggestions to buddy up with others in household	Tips on integrating home to home commute -text: Can you team up with a colleague/neighbour/ family member and agree to do this together? (Week 3. Active Commute Week)	Actify (PAHRCW@H)

## Sheet: BCT
Broad intervention component	Detailed component	Delivered via	Notes	BCTs
Suite of training/resources to cultivate physical skills among employees	Toolkit comprising an array of strategies/resources:	Toolkit hosted on Actify (PAHRCW@H)
	Videos and animations on importance of reducing sedentary behaviour and suggestions on how to move more while working at home	Toolkit hosted on Actify (PAHRCW@H)		4.1 Instruction on how to perform the behaviour 6.1 Demonstration of the behaviour 5.1 Information about health consequences 9.1 Credible source
	Videos and text on 50 minute meetings (and stretch between meetings)	Toolkit hosted on Actify (PAHRCW@H)	Blog webpage is external material	4.1 Instruction on how to perform the behaviour 6.1 Demonstration of the behaviour 9.1 Credible source 12.1 Restructuring physical environment 13.1 Identification of self as role model
	Information on DIY desks	Toolkit hosted on Actify (PAHRCW@H)		12.1 Restructuring physical environment 12.5 Adding objects to the environment 4.1 Instruction on how to perform the behaviour
	One-minute movers videos	Toolkit hosted on Actify (PAHRCW@H)	External material	4.1 Instruction on how to perform the behaviour 6.1 Demonstration of behaviour 9.1 Credible source
	Yoga videos	Toolkit hosted on Actify (PAHRCW@H)		4.1 Instruction on how to perform the behaviour 6.1 Demonstration of behaviour 9.1 Credible source
	Information on kneeling while working (Week 1 - Move more meetings)	Toolkit hosted on Actify (PAHRCW@H)	Webpage is External material	4.1 Instruction on how to perform the behaviour 6.1 Demonstration of behaviour 9.1 Credible source
	Step count challenge information	Toolkit hosted on Actify (PAHRCW@H)	External material	4.1 Instruction on how to perform the behaviour 9.1 Credible source
	Daily mile information	Toolkit hosted on Actify (PAHRCW@H)	Webpage is External material	4.1 Instruction on how to perform the behaviour 9.1 Credible source
	Suggestion to block out time in the calendar for movement	Toolkit hosted on Actify (PAHRCW@H)		12.1 Restructuring physical environment 4.1 Instruction on how to perform the behaviour
	Suggestion to incentivise breaks through self-delivered rewards	Toolkit hosted on Actify (PAHRCW@H)		10.7 Self incentive
Suite of training/ resources to cultivate psychological skills among employees	Toolkit comprising an array of strategies/resources:	Toolkit hosted on Actify (PAHRCW@H)
	Desk time calculator	Toolkit hosted on Actify (PAHRCW@H)		2.2 Feedback on behaviour
	Pomodoro Technique (Text and link)	Toolkit hosted on Actify (PAHRCW@H)	External material	4.1 Instruction on how to perform behaviour
	Link to Sticky Notes App	Toolkit hosted on Actify (PAHRCW@H)	External material	4.1 Instruction on how to perform behaviour
	Information on action planning across the 4 weeks on the Toolkit	Toolkit hosted on Actify (PAHRCW@H)		1.4 Action planning 1.1 Goal setting behaviour
	Reminders to move- Prompts delivered via MS Teams	MS Teams	Currently only available to deliver internally - working to explore how to deliver to external organisations	7.1 Prompts/cues 4.1 Instruction on how to perform behaviour 12.5 Adding objects to the environment 6.1 Demonstration of behaviour 9.1 Credible source 8.2 Behaviour substitution 8.3 Habit formation 8.4 Habit reversal
Action planning	Information and instructions for action planning across the 4 weeks in the Toolkit	Toolkit hosted on Actify (PAHRCW@H)		1.4 Action planning 1.1 Goal setting behaviour
	link to Sticky Notes App	Toolkit hosted on Actify (PAHRCW@H)	External material	4.1 Instruction on how to perform behaviour
Education on SB	Introduction to the issue video	Toolkit hosted on Actify (PAHRCW@H)		5.1 Information about health consequences 5.2 Salience of consequences 9.1 Credible source
	Infographic about sedentary behaviour while working at home	Toolkit hosted on Actify (PAHRCW@H)		5.1 Information about health consequences 5.2 Salience of consequences 9.1 Credible source
	Desk time calculator	Toolkit hosted on Actify (PAHRCW@H)		2.2 Feedback on behaviour
	Education through organisational initiatives and communication such as emails from LMs, one-on-one with LMs (see intervention components relating to LM, organisational initiatives and policies)	Toolkit hosted on Actify (PAHRCW@H)		5.1 Information about health consequences 5.2 Salience of consequences 9.1 Credible source 4.1 Instruction on how to perform the behaviour
	Toolkit created to allow for 'drip-feeding’ information	Toolkit hosted on Actify (PAHRCW@H)	Decide where to put this	8.7 Graded tasks
Intention formation	Information and instructions for action planning across the 4 weeks in the Toolkit	Toolkit hosted on Actify (PAHRCW@H)		1.4 Action planning 1.1 Goal setting behaviour
	link to Sticky Notes App	Toolkit hosted on Actify (PAHRCW@H)	External material	4.1 Instruction on how to perform behaviour
Training/resources for LM on knowledge about employee SB, factors impacting SB and opportunities to move	Introduction to the 'issue' video	Toolkit hosted on Actify (PAHRCW@H)		5.1 Information about health consequences 5.2 Salience of consequences 9.1 Credible source
	The importance of workplace culture video	Toolkit hosted on Actify (PAHRCW@H)		5.1 Information about health consequences 5.2 Salience of consequences 5.3 Information about social and environmental consequences 9.1 Credible source
	Step 1. Prioritisation checklist: What can change contains detailed information on opportunities for employees to move more	Toolkit hosted on Actify (PAHRCW@H)		1.2 Problem solving
	Step 2. How to make changes includes suggestions on how to support employees to move more	Toolkit hosted on Actify (PAHRCW@H)		1.2 Problem solving 4.1 Instruction on how to perform behaviour 13.1 Identification of self as role model 12.1 Restructuring physical enviroment 12.2 Restructuring social environment 12.3 Avoidance/reducing exposure to cues for the behaviour
	Step 3. Action planning template provides a template to implement ideas and plans to support employees move more	Toolkit hosted on Actify (PAHRCW@H)		1.1 Goal setting 1.4 Action planning 4.1 Instruction on how to perform behaviour
Strategies to increase movement over the day while W@H	Ditch the screen and have an active meeting-text and video (Week 1)	Toolkit hosted on Actify (PAHRCW@H)		4.1 Instruction on how to perform the behaviour 6.1 Demonstration of the behaviour 9.1 Credible source 8.2 Behaviour substitution
	Could you do 2-minutes of movement during meetings? Video- Movement ideas (Week 1 - Move more meetings)	Toolkit hosted on Actify (PAHRCW@H)		4.1 Instruction on how to perform the behaviour 6.1 Demonstration of the behaviour 9.1 Credible source 8.2 Behaviour substitution
	Suggestion for 50 minute meetings and stretch between meetings- text and video (Week 1 - Move more meetings)	Toolkit hosted on Actify (PAHRCW@H)	Blog webpage is not our material	4.1 Instruction on how to perform the behaviour 6.1 Demonstration of the behaviour 9.1 Credible source 8.2 Behaviour substitution
	information on kneeling while working (Week 1 - Move more meetings)	Toolkit hosted on Actify (PAHRCW@H)	Not our material	4.1 Instruction on how to perform the behaviour 6.1 Demonstration of the behaviour 9.1 Credible source 8.2 Behaviour substitution
	Tip for taking active breaks-Time for a short break- have a boogie video (Week 2. Active Breaks Week)	Toolkit hosted on Actify (PAHRCW@H)		4.1 Instruction on how to perform the behaviour 6.1 Demonstration of the behaviour 9.1 Credible source 8.2 Behaviour substitution
	Tips for taking an active break- Making a hot drink- could you try kettle-cises video (Week 2. Active Breaks Week)	Toolkit hosted on Actify (PAHRCW@H)		4.1 Instruction on how to perform the behaviour 6.1 Demonstration of the behaviour 9.1 Credible source 8.2 Behaviour substitution
	One minute movers videos (Week 2. Active Breaks Week)	Toolkit hosted on Actify (PAHRCW@H)	Not our material	4.1 Instruction on how to perform the behaviour 6.1 Demonstration of the behaviour 9.1 Credible source 8.2 Behaviour substitution
	Tips for taking an active break-Could you take a break and get some quick chores done? Why not water your plants? Video (Week 2. Active Breaks Week)	Toolkit hosted on Actify (PAHRCW@H)		4.1 Instruction on how to perform the behaviour 6.1 Demonstration of the behaviour 9.1 Credible source
	Suggestion to take micro breaks (Week 2. Active Breaks Week)	Toolkit hosted on Actify (PAHRCW@H)	Not our material	4.1 Instruction on how to perform the behaviour 6.1 Demonstration of the behaviour 9.1 Credible source 8.2 Behaviour substitution
	Yoga breaks (Week 2. Active Breaks Week)	Toolkit hosted on Actify (PAHRCW@H)	Note- says external links?	4.1 Instruction on how to perform the behaviour 6.1 Demonstration of the behaviour 9.1 Credible source
	Tips on integrating home to home commute - text and video (Week 3. Active Commute Week)	Toolkit hosted on Actify (PAHRCW@H)		4.1 Instruction on how to perform the behaviour 6.1 Demonstration of the behaviour 9.1 Credible source 8.2 Behaviour substitution
	Tips on integrating home to home commute -Become part of the Daily Mile nation- text and link (Week 3. Active Commute Week)	Toolkit hosted on Actify (PAHRCW@H)	Not our material	4.1 Instruction on how to perform the behaviour 9.1 Credible source
	Tips for integrating Tech to help us move more- Text on using tools on Laptop/computer, smartphone, smart speaker, watches (Week 4. Tech Week)	Toolkit hosted on Actify (PAHRCW@H)		4.1 Instruction on how to perform the behaviour 6.1 Demonstration of the behaviour 9.1 Credible source 8.2 Behaviour substitution
	Tips for integrating Tech to help us move more- Microsoft the clock app (Week 4. Tech Week)	Toolkit hosted on Actify (PAHRCW@H)	Link to App	4.1 Instruction on how to perform the behaviour 9.1 Credible source
	Tips for integrating Tech to help us move more-The Pomodoro Technique (Week 4. Tech Week)	Toolkit hosted on Actify (PAHRCW@H)	Not our material	4.1 Instruction on how to perform the behaviour 9.1 Credible source
	How could you reward yourself for moving more (Week 2. Active Breaks Week) text	Toolkit hosted on Actify (PAHRCW@H)		10.9 Self-reward
Suggestions to create make-shift equipment	DIY Sit-Stand Desk text and link (Week 1 - Move more meetings)	Toolkit hosted on Actify (PAHRCW@H)	Link is not our material	4.1 Instruction on how to perform the behaviour 6.1 Demonstration of the behaviour 9.1 Credible source 8.2 Behaviour substitution
	Could you set up a DIY standing desk Video and text (Week 1. Move more meetings)	Toolkit hosted on Actify (PAHRCW@H)		4.1 Instruction on how to perform the behaviour 6.1 Demonstration of the behaviour 9.1 Credible source 12.5 Adding objects to the environment 12.1 Restructuring the physical environmnet
Suggestions for organisational initiatives to promote movement while W@H	Step 1. Prioritisation checklist: What can change includes thinking about and prioritising organisational initiatives to support moving more (Step count challenge, scheduling moving meetings)	Toolkit hosted on Actify (PAHRCW@H)		4.1 Instruction on how to perform the behaviour 1.2 Problem solving 12.2 Restructuring the social environment
	Step 2. How to make changes includes suggestions for increasing employee access to work-related equipment	Toolkit hosted on Actify (PAHRCW@H)		4.1 Instruction on how to perform the behaviour 1.2 Problem solving 13.1 Identification as self as role model 12.2 Restructuring the social environment
	Step 2. How to make changes includes: (i) Suggestion to encourage employees to choose to take breaks while working and to move during online meetings and letting them know that this is a good thing to do. (ii) Suggestions for organised challenges (e.g. Step count Challenge, Active minutes challenge using fitness trackers) Encouraging moving during meetings (iii) Supporting colleagues to assign ti…	Toolkit hosted on Actify (PAHRCW@H)
Suggestions for actions and initiatives from LMs to demonstrate support for movement while W@H	Step 1. Prioritisation checklist: What can change helps line managers and leaders think about and prioritise elements that can help employees move more while WFH	Toolkit hosted on Actify (PAHRCW@H)		4.1 Instruction on how to perform the behaviour 1.2 Problem solving 12.2 Restructuring the social environment
	Step 2. How to make changes includes Email templates that LMs can send out to employees on: (i) The consequences of prolonged time spent sitting at a desk (iii) Opportunities for moving more during the work from home day (Iiii) Why you shouldn’t feel guilty about taking movement breaks while working at home (iv) The benefits of taking breaks: dispelling productivity myths (v) Consider Becoming a …	Toolkit hosted on Actify (PAHRCW@H)		4.1 Instruction on how to perform the behaviour 1.2 Problem solving 13.1 Identification as self as role model 12.2 Restructuring the social environment
	Step 2. How to make changes includes (i) Suggestion for LMs to discuss the benefits of break-taking and moving during team meetings or one-to-one meetings (ii) Suggestion to signpost Toolkit and Toolkit elements	Toolkit hosted on Actify (PAHRCW@H)
	Step 2. How to make changes includes suggestion to lead by example and be a role model	Toolkit hosted on Actify (PAHRCW@H)
Suggestions for policies and action that impact culture (including culture around online working) to allow for increased movement while working from home	Step 1. Prioritisation checklist: What can change Includes think about organisational policies to support moving more and changing social norms (for e.g. addressing lack of organisational policies, email etiquette, gaps between online meetings or standing during online meetings, addressing social pressure employees may feel to be avilable online all day)	Toolkit hosted on Actify (PAHRCW@H)		4.1 Instruction on how to perform the behaviour 1.2 Problem solving 12.2 Restructuring the social environment
	Step 2. How to make changes includes (i) suggestion to encourage employees to choose to take breaks while working and to move during online meetings and to let them know that this is a good thing to do (ii) Suggestion to adopt flexible working policies (iii) Suggestion to adopt 50 minute meetings (iv) Out of hours email or online communication policy (v) Normalising activities such as moving duri…	Toolkit hosted on Actify (PAHRCW@H)		4.1 Instruction on how to perform the behaviour 1.2 Problem solving 12.2 Restructuring the social environment
Suggestions for how colleagues can support each other to promote movement while W@H and initiatives that increase social support	Tips on integrating home to home commute - join a team challenge (Week 3. Active Commute Week)	Toolkit hosted on Actify (PAHRCW@H)		4.1 Instruction on how to perform the behaviour 12.2 Restructuring the social environment 3.1 Unspecified social support
	Step 1. Prioritisation checklist: What can change Includes thinking about increasing perceived support from colleagues	Toolkit hosted on Actify (PAHRCW@H)		4.1 Instruction on how to perform the behaviour 12.2 Restructuring the social environment 1.2 Problem solving
	Step 2. How to make changes includes suggestions for managers and other leaders act as role models and ‘lead by example’ through use of email templates, LMs and other leaders acting as a role model and giving explicit permission to move	Toolkit hosted on Actify (PAHRCW@H)		4.1 Instruction on how to perform the behaviour 1.2 Problem solving 12.2 Restructuring the social environment
Suggestions to buddy up with others in household/friends/family	Tips on integrating home to home commute -text: Can you team up with a colleague/neighbour/ family member and agree to do this together? (Week 3. Active Commute Week)	Toolkit hosted on Actify (PAHRCW@H)		4.1 Instruction on how to perform the behaviour 12.2 Restructuring the social environment 3.1 Unspecified social support
